# Supplementary material
Source: Springer Nature journal article supplement (https://www.springermedizin.de/resource/supplementary/12986_2011_416_MOESM8_ESM.pdf/25656054)

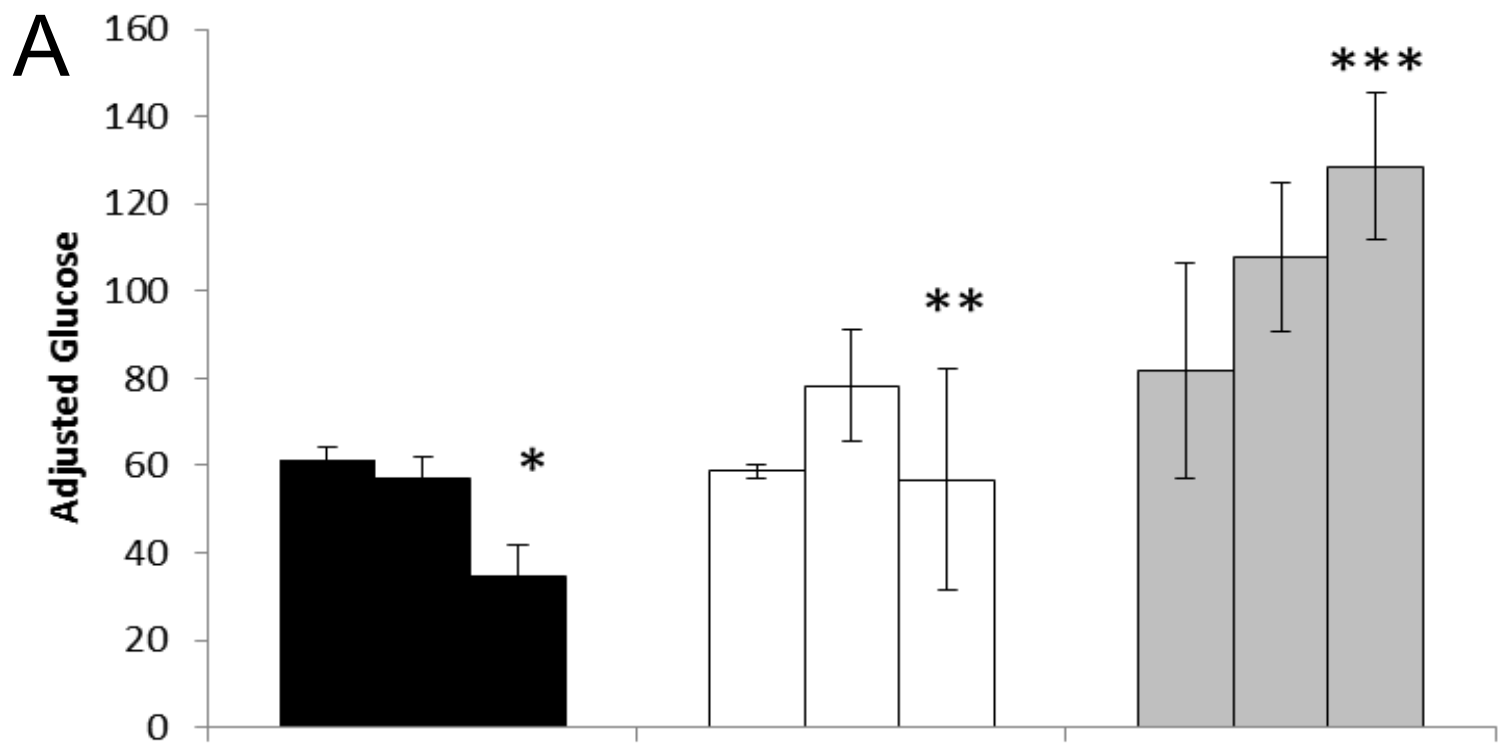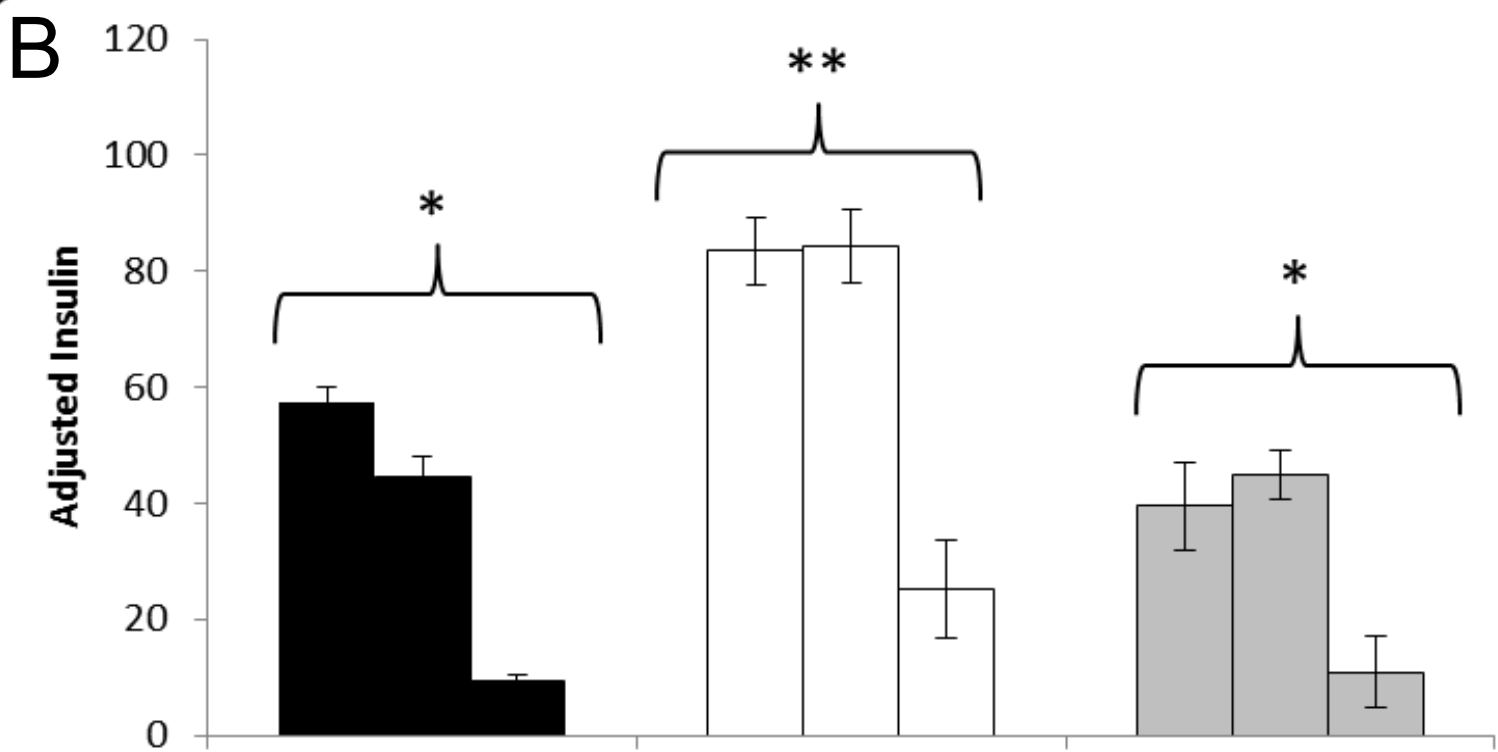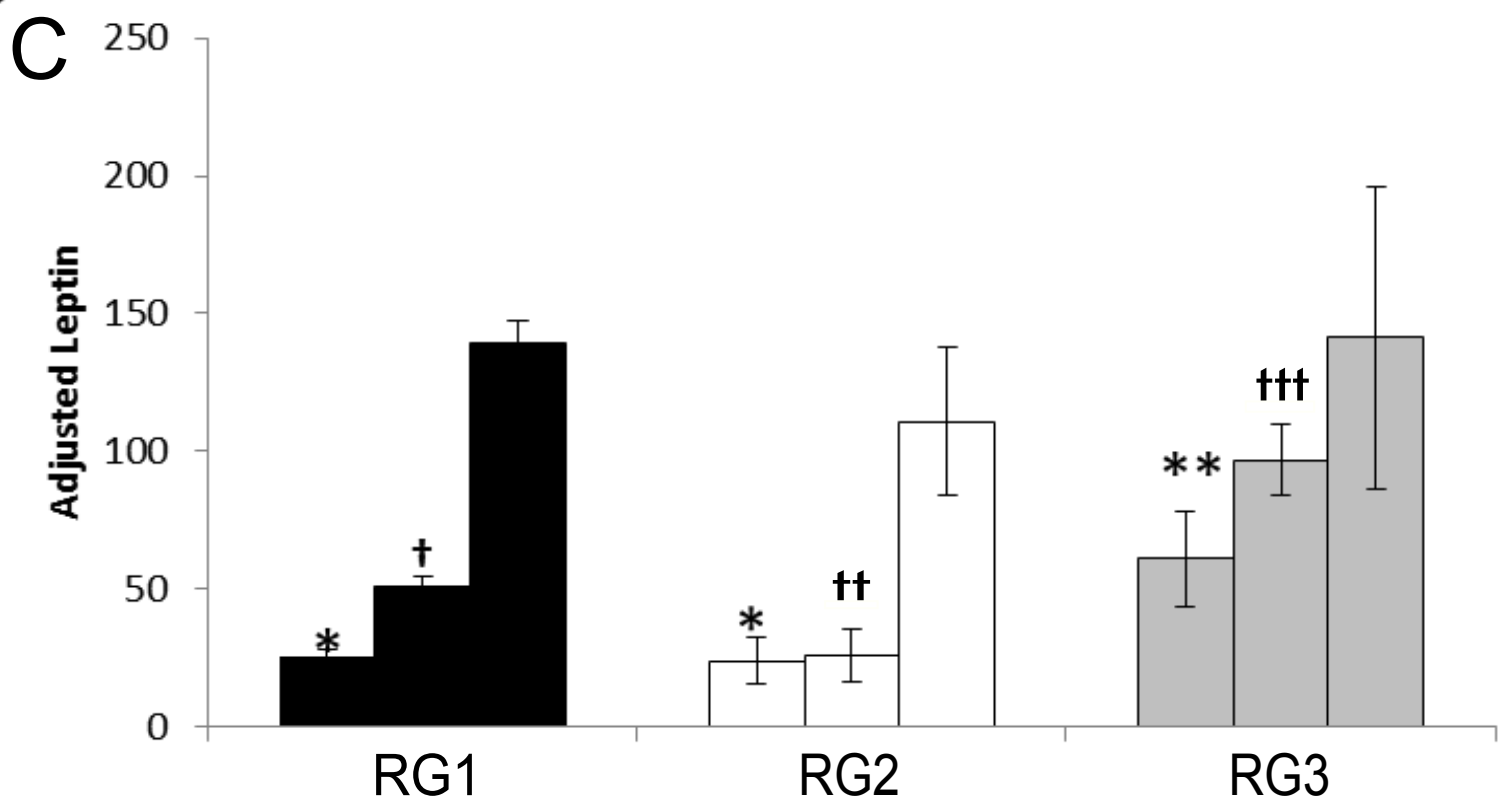

Supplement: MOESM8 [file 25656054]
